# Supplementary material for: CRISPR-Cas9 Gene Editing of the Sal1 Gene Family in Wheat
Source: MDPI journal article supplement (doi:10.3390/plants11172259), 2022-08-30
Supplement: s1 [file s1]

[illegible]

**Figure S3:** Alignment of the partial Sal1 protein sequences from *T. aestivum* cv. Bobwhite, *B. distachyon* (Bradi4g40860) and *A. thaliana* (AT5G63980). The proteins were trimmed to remove the regions not sequenced in Bobwhite (outside of the regions targeted for CRISPR editing). There is a gap at residue 60 in the 5B gene that was not able to be amplified and sequenced (black box). Highlighted areas show the conserved regions targeted by the 5' (maroon), middle (green) and 3' (teal) gRNAs. Cysteine residues conserved in the grasses are shown in red text. Amino acids highlighted in yellow are unique to a portion of the wheat homeologs. The different amino acids caused by the single base pair deletion in 4A-1 are highlighted in gray.
