# Supplementary material for: CRISPR-Cas9 Gene Editing of the Sal1 Gene Family in Wheat
Source: MDPI journal article supplement (doi:10.3390/plants11172259), 2022-08-30
Supplement: s1 [file s1]

**Figure S5A**

***SAL1* 4A**

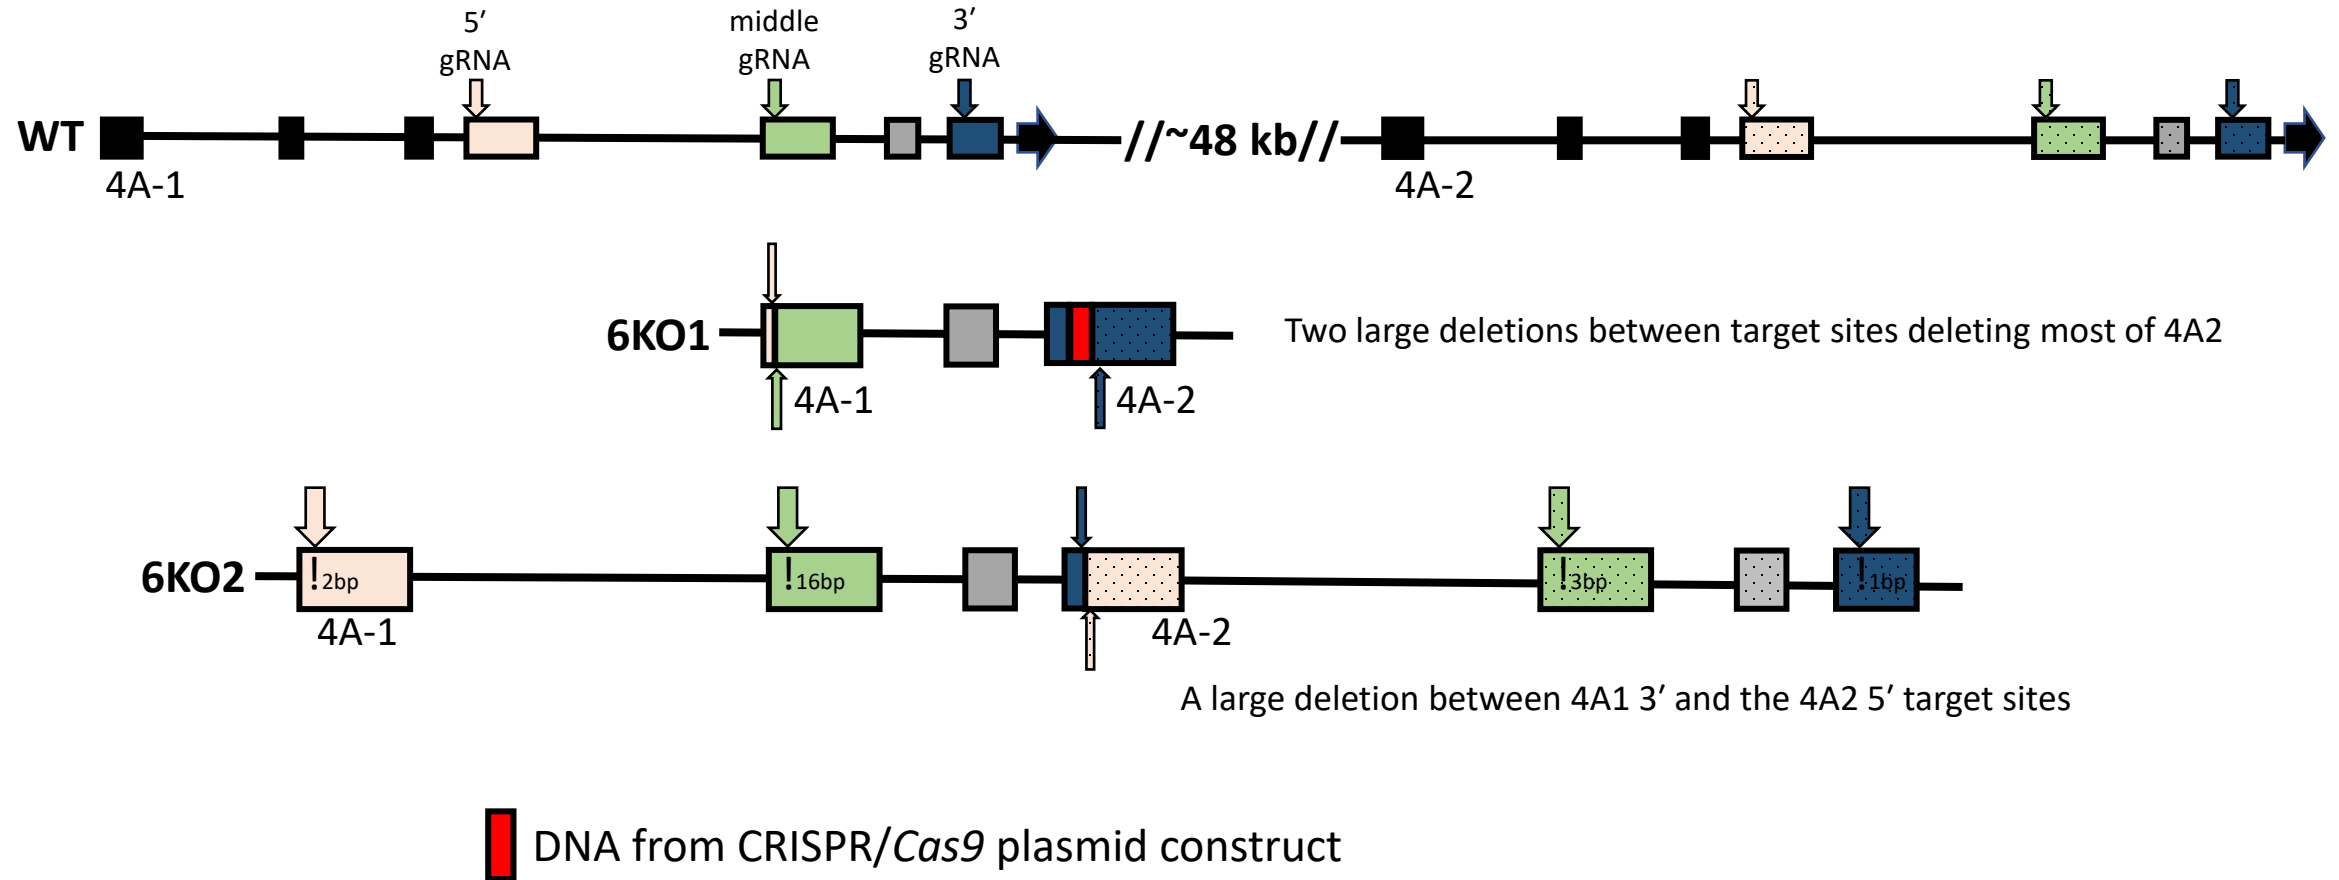

**Figure S5:** Major rearrangements, insertions, and deletions seen in 6KO1 and 6KO2 *sal1* mutants. The genes are shown as diagrams with boxes denoting exons and lines representing introns. The gRNA targeted regions are marked with the 3 colored arrows. The exons are also colored to aid in distinguishing one exon from another. The 4A2 exons are stippled to distinguish them from the 4A1 exons. The wildtype (WT) Bobwhite *Sal1* genotype is shown on the top of each panel with diagrammatic representations of the mutant genotype shown below. Regions of sequence inserted from the plasmid transformation construct are shown as red boxes. Small deletions are represented with an exclamation mark and label showing the number of deleted nucleotides. **A.** 4A1 and 4A-2 **B.** 7A **C.** 5D. For more information on the mutant genotypes see Table S5.

Figure S5B

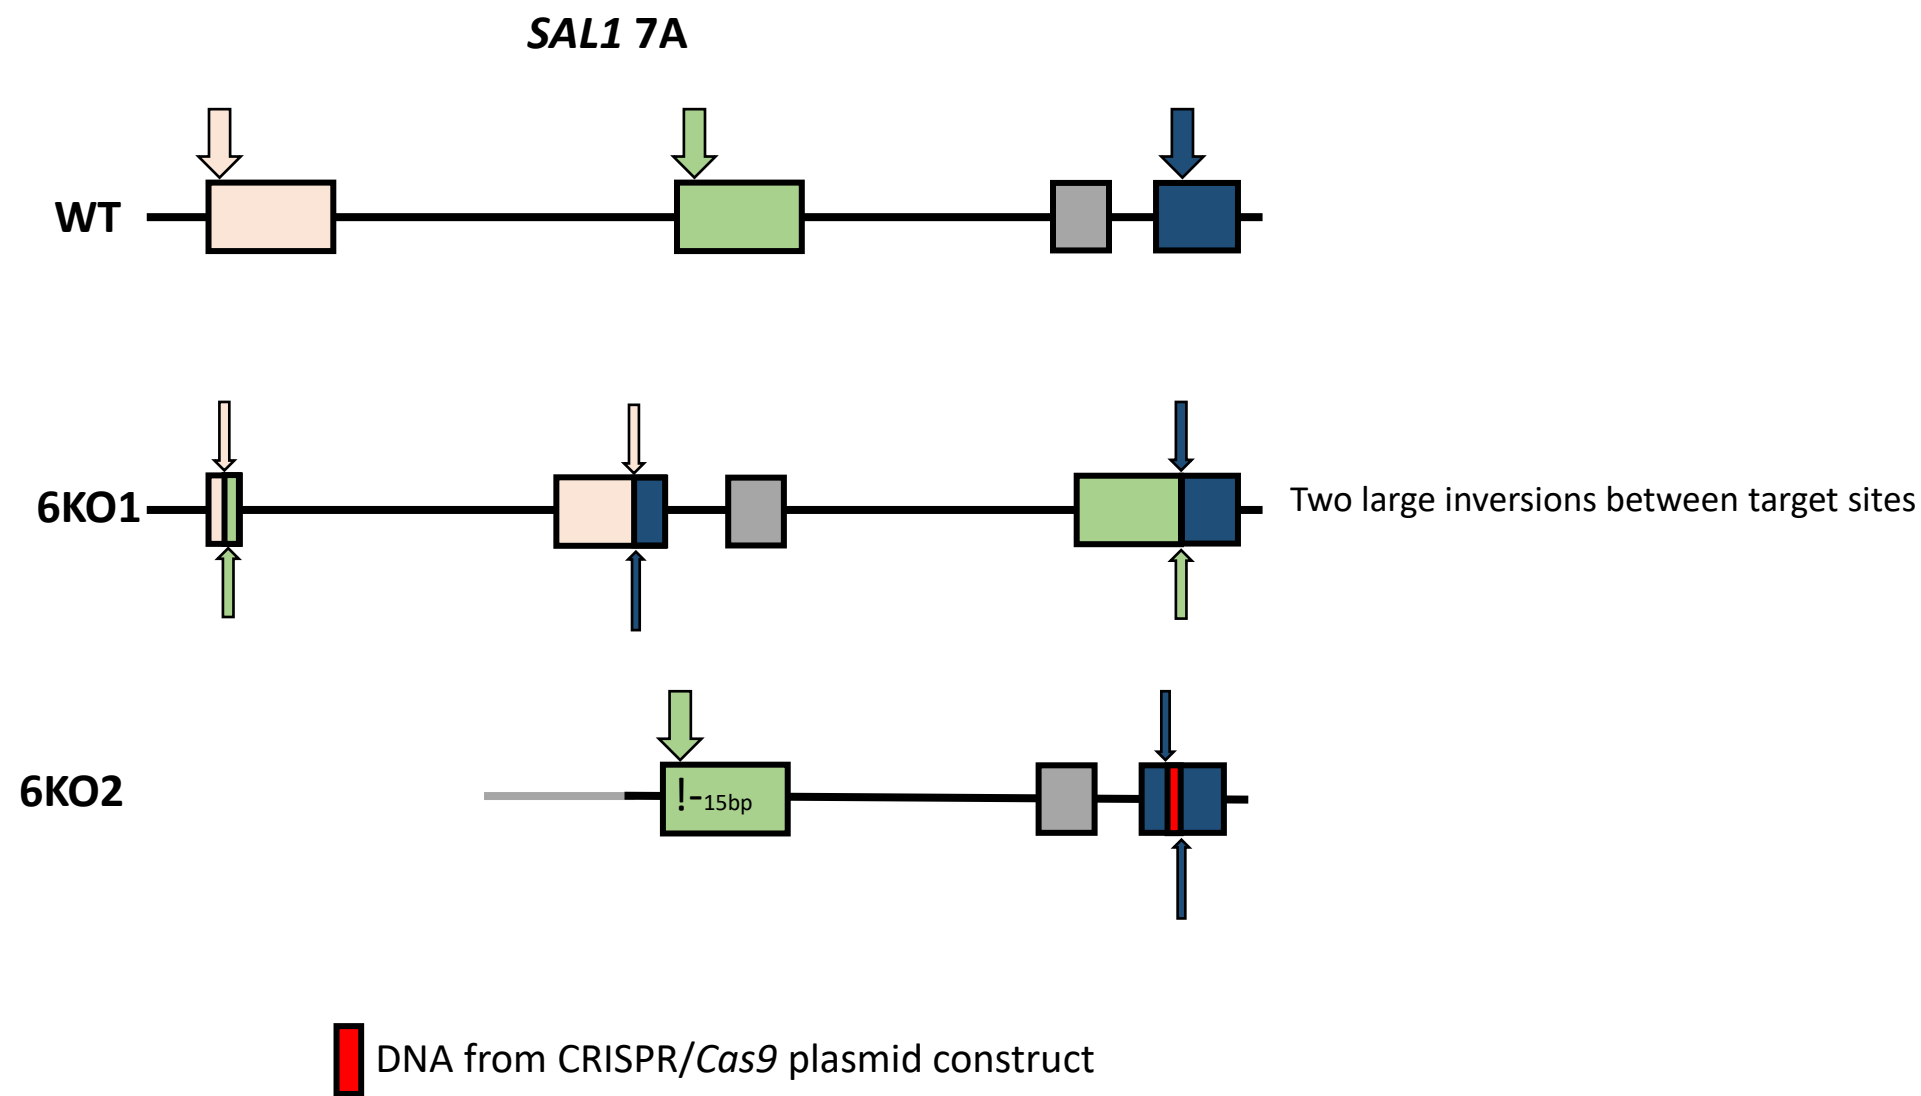

Figure S5C

*SAL1* 5D

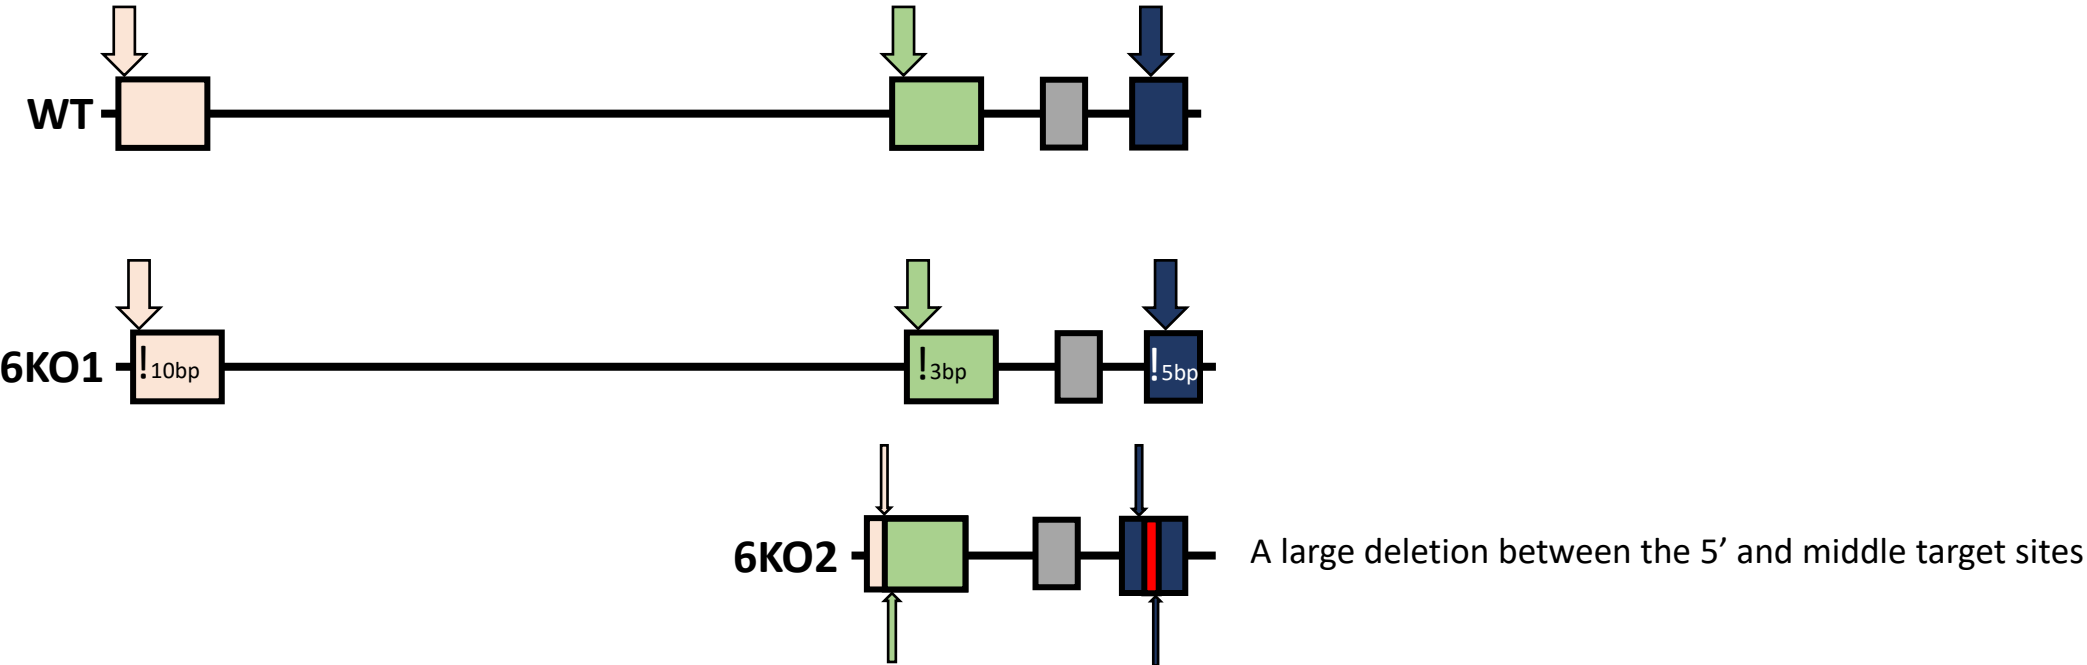

A large deletion between the 5' and middle target sites
