# Supplementary material for: CRISPR-Cas9 Gene Editing of the Sal1 Gene Family in Wheat
Source: MDPI journal article supplement (doi:10.3390/plants11172259), 2022-08-30
Supplement: s1 [file s1]

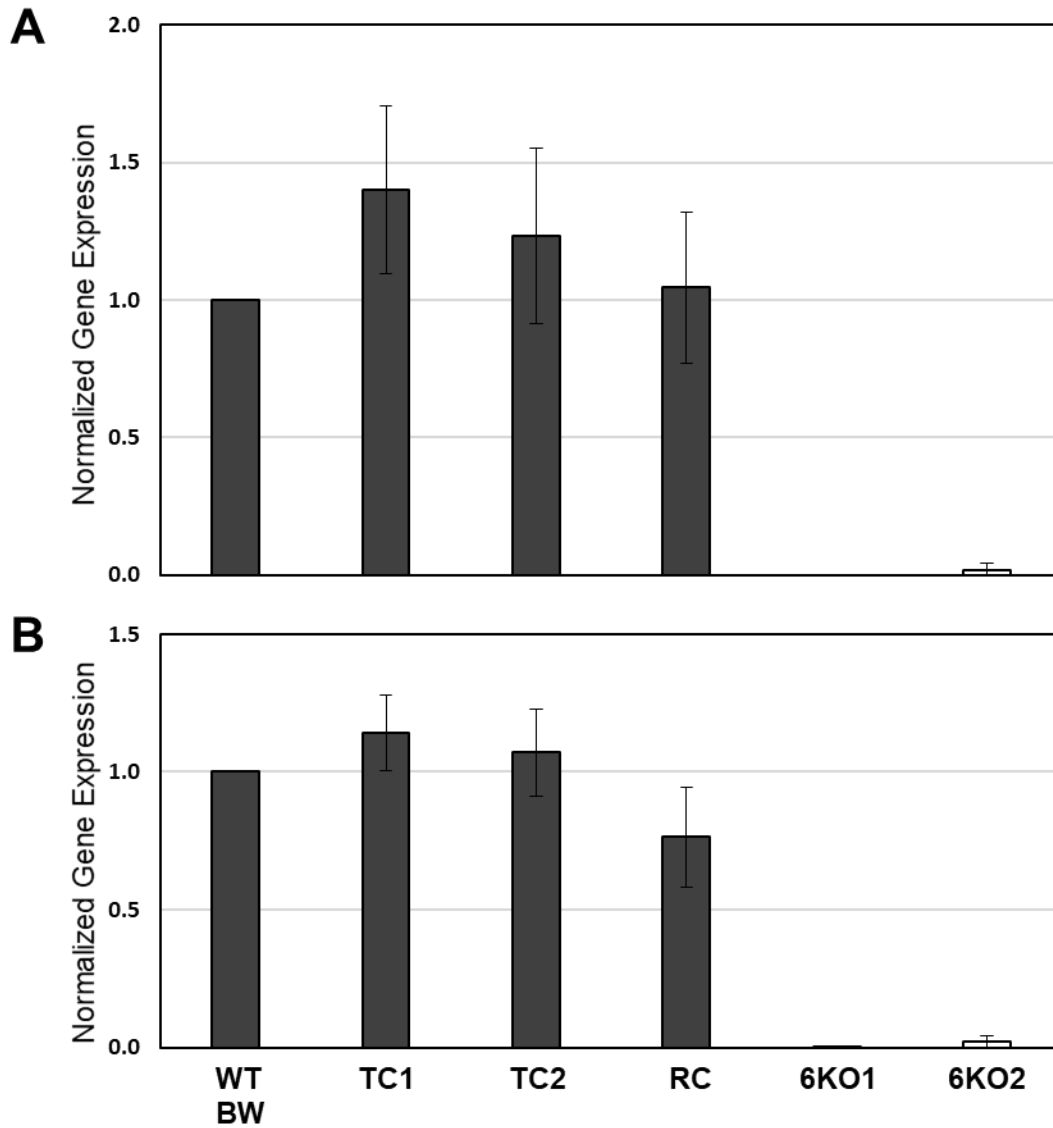

**C**

| Primer            | Oligo Sequence 5' to 3' | Product size (bp) | Target                          | Source     |
|-------------------|-------------------------|-------------------|---------------------------------|------------|
| CJ705892_Foward1  | GCCTCAGTGGTAGGAGCATT    | 116               | CJ705892                        | [45]       |
| CJ705892_Reverse1 | TTCAGCAAATGCGGTGGTTG    |                   |                                 |            |
| 1491              | AGTTGTTTTGGCGTGTGG      | 98                | <i>Sal1</i> Chromosome 5        | This study |
| 1492              | TCTACTCAGCACCAACA       |                   |                                 |            |
| 1457              | TGCGTGATTTTACTGGCTGTG   | 187               | <i>Sal1</i> Chromosomes 7 and 4 | This study |
| 1458              | GGCTGCATGATCCCATACCG    |                   |                                 |            |

**Figure S6.** *Sal1* transcript levels in the 6KO1 and 6KO2 mutants. Quantitative RT-PCR was used to examine *Sal1* transcript levels in wildtype Bobwhite (WT BW), other control lines (TC1, TC2, RC) and the 6KO1 and 6KO2 mutants. **A.** Normalized *Sal1* 5B and 5D transcript levels of control lines (grey bars) and the 6KO mutants (white bars). **B.** Normalized *Sal1* 7A, 7D, 4A1 and 4A2 transcript levels for of control lines (grey bars) and the 6KO mutants (white bars). **C.** The primers used for the reference transcript (CJ7052892) and *Sal1* transcripts.
