# Supplementary material for: CRISPR-Cas9 Gene Editing of the Sal1 Gene Family in Wheat
Source: MDPI journal article supplement (doi:10.3390/plants11172259), 2022-08-30
Supplement: s1 [file s1]

**Figure S2:**

Sequences of wildtype Bobwhite *Sal1* regions. Exons are in uppercase, introns are in lowercase. Red highlights indicate mutations leading to amino acid changes in Bobwhite relative to Chinese Spring. The yellow highlighted region in *Sal1* 5D indicates the sequence used to interrogate the high-quality wheat genome sequences available at GrainGenes (this region is identical in Bobwhite and Chinese Spring).

>Ta Bobwhite *Sal1* 4A-1

```
CAAGGCGGATAAGACTCCTGTGACCGTAGCTGATTATGgtacatgctcaccttgcaactgtttacctcca
ggtgacctgtatctgctgtttgatgcttaattagcagtcctcatactcaaaccacaattcaagtcagttcg
atgtttcttgatttaacttacatggagatgtaagatttctgaatggcatggctcagggatgtaagaac
attcagggtcgtatgatcttcacagtttacattagcatttggaacttggttcgttctctcaacttcccgt
tcaggtgataaatttccttttcatacatgtagGATCCCAAGTGTGGTAAGTTTTGTGTTAAATATGGAAG
TAACTTCTGGTTCCCTTTTCTATGGTGGCTGAGGAGgtaaatacacttggtgtttcggttaaatcgtttctgt
gtataatacataagtatctacacgacctgagtggttgatgtacgcagGACTCAGAAGACTTGAGAAAG
GATGGCGCTGAAGAAATCTTGAGCGCATTACTGATCTTGTAACAAAACCTCTCGCCGAGGATGGTTCAT
ACAACATTTTATTATCTAAGGAAGCTATCCTCTCTGCAATTGATACCGGGAAGTCCGAGGGTGGTCCATC
TGGCCGACATTGGGTTCTAGATCCAATTGATGGGACTAAAGGgtgagctatggtaactccaacctgcagg
tttcacattcttctaagtgtgataaaaaagtgcctgttttttcgccaattgcaacatctattgtagtagt
ttctacaactgccttcttgctcgccaaaatcagcggttgctgctttaatttggttgtagtttttctaataca
ttaattattcaaggtagcaggcaccacactactgccttctttcaaacaactggagttctgacgtttgact
ctaatttctgcatatggaaatgaattcttttactgacgatcttatttaagcagtagagatgccaatatta
ctacggaaatttcgtgaagcagttctatgtaaacatacacgggttctcttttcagagatagcttggtgaag
tgctagcaactgatcagtttagctggcaagattaagtacctctctttcatgccccatatttgaaactaaca
ttctgtactgattaaccgtgaacactaatagcattggttgaaaagaaagacattgcagtcattggatgac
acctcatgttggttactatctttgcctataatacattttgatcttggtttgtcttaataacttgattcag
ATTCTGTGAGAGGAGGCCAATATGCCATTGCACTGGCACTGCTTGATGAGGGCAGAGTTGTCTTGGGTGTG
TTGGGATGTCCAAATCTTCCTTTTACATCAGTAAGTAACCTCGGTGGTAGCTCATCAGGAGATCAAACCG
GGGCCCTCTTTTACAGCTGCAATCGGTTGTGGTGCTGAAGTACAGTCGTTAGATGGCTCTCCACCACAAAA
Ggttattaccactttcaatctcttttatttgattttaatcagtttaaggctgtttgtgcctatgtgagtta
ttttcttttcttgatgattgacttgcttctgggttctggctaactttcattacagATTAGTGTGTGTACCA
TCGACAATCCAGTCAATGCCTCTTTCTTTGAATCCTATGAAGGAGCACACTCGATGCGTGATTTTACTGG
CTCTGTAGCGGAGgtttgatcttgatcactcttttgctttggctatatccattgcagtagaaactaattct
gtgtttgagtgctagtagAAACTTGGTGTCCAAGCTCCGCCAGTCAGAATAGATAGCCAAGCAAAATATG
GTGCTCTGGCCCGTGGAGATGGTGCCATTTACTGGCGTTTTCCACACGAGGGTTACAGGAAACGATATGG
GATCATGCAGCCGGCTCAATTGTCGTCACAGgtaagaacatttctctctgttttttgaaacaacgaactc
aactgaagaatacacatttcttacttccatttttctgatgtttcccagAAGCTGGAGGTGTAGTTAAAGA
TGCCCTCAGGAAACGATCTCGATTTCTCgAAAGGCAGATaTCTTGttCGTGACACAGGCATCATTGCCACA
AATAAACAGTTGATGCCATCAGTCCTGAAGTCTGTCCAG
```

>Ta Bobwhite *Sal1* 4A-2

```
AAGGCGGATAAGACTCCTGTGACCGTAGCTGATTATGGTACATGCTCACCTTGCAACTGTTTACCTCCAG
GTGCCTGTATCTGTTGTTTGGTGATGCTCAATTAGCAGTCCTCATGCTCAAACCATAATTCAAGTCAGTC
AATGTTTCTTGATTTAACTTACATGGAGATGTTAATATTTCTGAATGACATGGCTCGGGGATGTAAAGAA
CATTCGGGATCGTATGATCTTCGTCAGTTTACATTCACATCTGAAACTTGTTTCGTTCTCTCAATTTTCA
CATTCAGGTGATAATTTTCTTTTACATATGTAGGATCTCAAGTATTGGTAAGTCTTGTGTTAAATAAGG
AAATAACTTCTGGCTCCTTTTCTATGGTGGCCGAGGAGGTAAATCACTTGTGTTTCGGTTAAATTATTTT
TGTGTATAATACACAAGTATTCTACACGACCTGAGTGTTTGTACGTACGCAGGACTCAGAAGACTTGAGA
AAGGATGGCGCTGAGGAAATCTGGAGCGCATTACTGATCTTGTAACAAAACCTCTCGCCGAGGATGGTT
CATAACAACATTTTATTATCCAAGGAAGCTATCCTCTCTGCAATTGATACCGGGAAGTCCGAGGGAGGTCC
ATCTGGCCGACATTGGGTTCTAGATCCAATTGATGGGACTAAAGGGTGAAGTATGGTAACTCCAACCTGC
```

AGGTTCCACATTCTGCTAATGTGATAAAAAAAAAAGTGCCTGTTTTTCCGCCAATTGCAACATCTATTGT  
AGTAGTTTCTACAACGCCTTCTTGCTCGCCAAAATCAGCGTTGCTGCTTTAATTGTTGTGAGTTTTTC  
TAATCATTAATTATTCAAGGTAGCAGGCACCACTGCTTTCTTTCAAACAACCTGGAGTTCTGACGTTTGAC  
TCTAATTTCTGCATACGGAAATGAATTCCTTTACTGACGATCTTATTTAAGCAGTAGAGATGCCAATATT  
ACTACGCAAATTTCTGTAAGCAGTTCTATGTAACTATACACGGTCTCTTTTCTGAGATAGCTTGTGAA  
GTGCTAGCAACTGATCAGTTAGCTGGCAAGATCAAGTACCTCTCTTTCATGCCCCATATTTGAACTAAAC  
ATTCTAAACTGATTAACCGTGAACACTAATAGCATTGTTTTGAAAAGAAAGACATTGCAGTCATTTGATGA  
CAGCTCATGTTGTTACTATCTTTGCCTATAACACATTTTGATCATTTTTTTGGTTTTGTCTTAATAACTTG  
ATTGAGATTTCGTGAGAGGAGGCCAATATGCCATTGCACTGGCACTGCTTGATGAGGGCAGAGTTGTCTTG  
GGTGTGCTGGGATGTCCAAATCTTCTTTTACATCAACAAGTAACCTCAGTGGTAGCTCATCAGGAGATC  
AAACCGGGGCCCTCTTTTCAGCGGCAATCGGCTGTGGTGCTGAAGTACAGTCGTTAGATGGCTCTCCACC  
ACAAAAGGTTATTACCACTTTCAATCTCTTTTATTTGATTTTAATCAGTTAAGGCTGTTTGTGCCTATGT  
GAGTTATTTTCTTTTCTTGTGATTGACTTGCTTCTGGCTAACTTTCATTACAGATTAGTGTGTGTACTAT  
TGACAATCCAGCCAATGCCTCGTTCTTTGAATCCTATGAAGGAGCACACACGATGCGTGATTTTACTGGA  
TCTGTAGCGGAGGTTGATCTTGATCACTCTCTGCTTAGGCTATATCCATCGTAGTAGAACTAATTCTG  
TGTTGAGTGCTACTAGAACTTGGTGTCCAAGCTCCGCCAGTCAGAATAGATAGCCAAGCAAAATATGG  
TGCTCTGGCCCGTGGAGATGGTGCCATTTACTGGCGTTTTTCCACACGAGGGTTACAGGGAAACGATATGG  
GATCATGCAGCCGGCTCAATTGTCGTCACAGGTAAGAACATTTATCTCTGTTTTTTTTTCGAAACGATG  
AACTCAACTGAAGAATACACATTTCTTACTTCCATTTTTCTGATGTTTCCCAGAAGCTGGAGGTGTAGTT  
AAAGATGCCTCAGGAAACGATCTCGATTTCTCGAAAGGCAGATTTCTTGATCGTGACACAGGTATCATTG  
CTACAAATAAACAGTTGATGCCATCAGTCCTGAAGTCTGTCCAG

>Ta Bobwhite *SalI* 5B 5' target region

tagGATCTCAAGTATTGGTAAGTCTCGTGTTAAATATGGAAGTAACTTCTGGTTCATTTTCTATGGTGGC  
CGAAGAGgtaattcacttgctgctgctattaaattattctgtgtttaataatacataagttggttatggcgc  
tgctagaaggagggcacgagagggccggccgggggcttttgcccacggccaggcaagaggggaagggtt  
tccttcttaattcttgcttgattgattgatacatctcctctctttatatagagaggtttacttgactct  
caagcaaggcttacttggcccctaagcaaacgacccttatctctaattaaccctaagactaatgggccc  
ttaggcccattacgtactcttaacactacacccacctggacatgcagcttgctcctcgagctgcagccta  
accaacttataaccatgactcgacgcaacacaaacctaacacctaataaacaagccttttacatctcggct  
tgttttattattctcaacctgaaatagactaggacgctttattttgagcgtgcagctgtacagccacctg  
gatcccatggacaccacctggacaaaaggagtgcattgtgtatggctggttggtctgcaccgcacaggggaag  
agtggaggggcttgcatggagaatgacgaggaggggtgcgcccccaaccgccgatgtcgcagactttg  
aggctggtgcccgcggggaaaacagcatgccggccgcccgtgggggaaaccacatgcccaagatccccga  
cgcagcggacgagatcgaggtcctttgcgagcgaagggaacttgaggagcggcagctgcagaccacg  
catctcccgcacacgcccagcgcgctaggagggcgcgcgagcagcctgcagcctcaccgcccgcgacacg  
tggcgggtagcgatccaagatggaagcagtgcagggcgcgacagggacttgatctgctggatgtggacgc  
cctgggatggcggcgacgctgatgggaacgaggtcgtcgcactcccgtcgtagggcacccatactgggc  
ggcggagctcaccggcggtggcagctgcagctgcagcggctgctgcggtgctcgtgccgggcagcggcagc  
ggttgctgcggcgagcgcggggcgcgcgaggctgctaggagcggcggtgccactgcagccagggtt  
gggcggtggtggcgaatggatggcagctgcagcggcgcgcgaggccgctaggagcggcggttgccactg  
caaccagggttgggcggtggtggcgaatggatgcagctgcagcggcgcgcggaaggccgcctggtgcggc  
ggctgccatggcagccacggtggcgagaggcgcgatgggcgggcgagccgggtgcggtccgtaggacc  
cggccaaagaacaggcggtatctcctggaccgcctgggttaggtcccgcagcaccgccggacacctcctccca  
ggtgaggacagcggggggcgggcgcgagggatcccgcgcgggcaggagtggggcgagcgtcggtggtg  
gtcgcgggagggcgacaaggtgaccggcagcgggaagagacgggcttggcggcggtgaagacatgatcgaac  
cgaagctagctgatacgaattgttatggcgctgctagaaggagggcacgagagggccggccgggggctt  
tttgcccacggccaggcaagaggggaagggttcccttcttaattcttgcttgattgattgatacatctc  
ctctctttatatagagaggtttacttgactctcaagcaaggcttacttggcccctaagcaaacgaccctt  
atctctaattaaccctaagactaatgggcccattaggcccattacgtactcttaacataagtattttacg  
gttaagtgggtgtacatacatagGACTCAGAAGACTTGAGAAAGGATAGTGCTGAAGAAATCTGGAACA

TATTACTGATCTTGTAATGAACTCTCGCTGAGGATGGTTCATACAACATTACTTTATCTAAGGAAGGT  
ATCCTCTCTGCAATTGATACTGGGAAGTCTGAAGGAGGTCC

>Ta Bobwhite *Sal1* 5B middle and 3' target region

agTTTCTTGAGAGGAGGCCAATATGCAATCGCACTGGCACTGCTTGATGAGGGCAAAGTTGTTTTGGGCG  
TGTTGGGATGTCCAAATCTTCCTTTGACATCAATAAGCAACCTCAATGGTAGCTCATCAGGAGATCAAAC  
AGGGGCCCTCTTTTCAGCTACAATTGGTTGTGGTGCTGAAGTAGAGTCATTAGAGGGCTCTCCACCACAA  
AAGgttattaccattttctagctcttttattttgatttgaaatagttaagcccatttctacctatgtgag  
atattttgtttttattattgactcgcttctggttaactttcattatagATTAGTGTTTGTACCATTGACA  
ATCCAGTGAATGCCTCGTTCTTTGAATCCTATGAAGGAGCACACACAATGCATGATTTAACTGGCTCTAT  
AGCGGAGgtttgatcttgactagctctttgcttaggctatatccgttttagtagaaactaattccgtgttt  
gagtgtaccagAAACTTGGTGTCCAAGCTCCTCCAGTCAGAATAGATAGCCAAGCAAAATATGGTGCTC  
TGGCCCGTGGCGATGGTGCCATTTACTTGCGTTTTCCACACAAGGGTTATAAGGAAAAGATATGGGATCA  
TGCAGCTGGCGCAATTGTCGTCACAGGtaatacatttctctttatttttgtaatacatttctctttat  
atttttaacaaggaactcggtgaaggatacatatttcttactttacgttttcgtgtgttccccagAA  
GCTGGAGGTGTAGTAACAGATGCCTCAGGAAACGATCTTGATTTCTCGAAAGGAAGATTCTTGATGTTG  
ACACAGGCATCATTGCCACAAATAAGCAGTTGATGCCATCACTGCTGAAGTCTGTCCAGGA

>Ta Bobwhite *Sal1* 5D

GGTTCATTTTCTATGGTGGCCGAAGAGGtaattcacttgtgttgctattgaattactctgtgtttaatag  
tacataagtatttttcggttaagtgggtgtacgtacatagGACTCAGAAGACTTGAGAAAGGATAGCGCT  
GAAGAAATTCTGGAACATATTACTGATCTTGTAATGAACTCTCGCTGAGGATGGTTCATACAACATTA  
CTTTATCTAAGGAAGGTATCCTCTCTGCAATTGATACTGGGAAGTCTGAAGGAGGTCCATCTGGCCGACA  
TTGGGTCTGGATCCAATTGATGGGACTAAAGGgtgagctatggtaactgcaacctgcaggtgtcacaat  
ctgctaattgcgagaaatgcattttttccaccattactctaccatctactctactagttattataagt  
ccttctttctcaccaaaaccagcggtgtgatttgctgtccgtgttcctaatacattagttattcaaggta  
gcaggcaccactgccttctttcaaatactgaattcctgacctatgggtcttaagttcttcatacagaa  
tgaattattttaccaattatcttatttaataatttatctgtgtttcttagatctgatttatgcctcgctc  
aagtataattgggtgcatctcatatgccatcgacaaacatgcgatgatgtgccatttttgcataactgggtt  
agtgaagcatgctactgtatggatatgttaagcaaaatatcaattctctcttggcatttatgctgatatt  
acattgatgtacattttgcccttcctatatataaatagaaaagggtcaataaggtagtgttttatctattac  
attgtcttttcaattaagaaaccataagcatgataggcgttgacataaagcagaagaatttcatgaagt  
taaactcatgcaagcaatattacagcaaagggaaaactaaatgtagattcaaggggtgattcttgaggtt  
agggtttaggtacttgtgcattttgagaaaaatttcaaattaatcatggatgtgcatattgtaagaactt  
ttcacctgcgaaaattcatgcaaataatgataaaaaataaagaaagaaagtgttgaattatacta  
ttcaaaaaataagttactttctttttctttttgcgcgggggtatgcttgtaataatgttccgtgttttg  
taggtcctcatattatgacatgatgcacatctatgatttgtttttgaaaatttaagctgcagaagtgggt  
aaacctaaaatcaagcacacaccttcatgtacaacaattgataatttgactctacaattgaagggttg  
cccttgatcttccatggcacaacaatttggtagaaatgacattaccatctgacgcaatgagatggaagg  
atcatcttacacaatgacaagcagtagaagtgccaatattacttcaaaaaaattgtgaaccagttcttag  
taaactgtattctgttcccttatctgagatagctcgtgaagtgtcaaaaactgatcagctagctggctag  
attgaatgccctttctttcatgtcccatatttttagctaaaacatttcaacctgatcaatcgtggacagta  
cttaccattgtttgaaaagaaagacattccgccatttgatgatggatttttctgctgaaaaacaatgat  
atgcaatgcagcacctcttgttgttactatctttgcctataatacattttgaccatttttgtgttgttt  
aataacttgattcagTTTCTTGAGAGGAGGCCAATATGCAATCGCACTGGCACTGCTTGATGAGGGCAA  
GTTGTTTTGGGCGTGTGGGATGTCCAAATCTTCCTTTGGCATCAATAAGCAACCTCAATGGTAGCTCAT  
GCGGAGATCAAATGGGGGCCCTCTTTTCAGCTACAGTTGGTTGTGGTGCTGAAGTAGAGTCATTAGAGGG  
CTCTCCACCACAAAAGgttattaccattttctagctcttttattttgatttgaaatagttaagcctat  
ctacctatgtgagatattttgtttttattattgactcgcttctggttaactttcattatagATTAGTGTT  
TGTACCATCGACAATCCAGTGAATGCCTCGTTCTTTGAATCCTATGAAGGAGCACACACAATGCATGATT  
TAACTGGCTCTATAGCGGAGgtttgatcttgactagctctttgcttaggctatatccgttttagtagaaac  
taataccgtgtttgagtgtaccagAAACTTGGTGTCCAAGCTCCTCCAGTCAGAATAGATAGCCAAGCA

AAATATGGTGCTCTGGCCCGTGGCGATGGTGCCATTTACTTGCGTTTTCCACACAAGGGTTATAAGGAAA  
AGATATGGGATCATGCAGCTGGCGCAATTGTCGTCACAGGtaatgcatttctctttatttttgtaataca  
tttctctttatttatttttaacaaggaactcggtcaaggatacatatttccttattttcccttttcgt  
gtgttccccagAAGCTGGAGGTGTAGTAACAGATGCCTCAGGAAACGATCTCGATTTCTCGAAAGGGAGA  
TTTCTTGATGTTGACACAGGCATCATTGCCACAAAATAAGCAGTTGATGCCATCACTGCTGAAGTCTGTCC  
AGGA

>Ta Bobwhite *Sall* 7A

CAAGGCGGATAAGACTCCTGTGACCGTAGCTGATTATGgtacatgctcactctgtaactgtttacctcca  
ggtgcatgtatctgctgtttgatgctcaattagcagtcctcatactcaaaccataattcgagtcagtcga  
tgtttcttgatttaacttacatggagatattaagatttctgaatgacatggctcagtgatgtaaagaaca  
ttcagggctcgtatatatgatcttcatcagtttacattcacatttgaaactagttcgttctctcaactccc  
cattcaggtgataattttattttcatacatgtagGATCTCAAGTACTGGTAAGTGTGTGTTAAATATGG  
AAGTAACTTCTGGTTCCTTTTCTATGGTGGCCGAGGAGgtaaatacacttggtgttccgggttaaatacattta  
tgtgtataatacataagtattctacacaacctgagtggttgtagctacgcagGACTCAGAAGACTTGAGA  
AAGGATGGCGCTGAAGAAATTCTGGAGCGCATTACTGATCTTGTAACAAAACCTCTCGCTGAGGATGGTT  
CATACAACCTTTTATTATCTAAGGAAGCTATCCTCTCTGCAATTGATACCGGGAAGTCCGAGGGAGGTCC  
ATCTGGCCGACATTGGGTTCCTAGATCCAATTGATGGGACTAAAGGgtgagctatggttaactccaacctgc  
agatttcacattctgctaatacgataaaaaaatgtctggtttttccgccaattgcactatctattgtac  
agtagtttctacaactgccctcttgctcaccaaaaccagtggttgctgctttaatttgctgtgcgtttttc  
taatcatttatttcgaggtagcaggcaccactgccttctttcaaacaactagagttctgacctatgactct  
tcatacagaaatgaattcttttaccacaactcttatttaacaagtacagatgccaatattactacggaaa  
tttctgaaccagctctatgtaaactatccgctgttcttcttttgagatagcttggaagcgcgctaaca  
actgatcagtttagctggcaagattgtatacatctctcatgccccatattttaactaaacatttcgaaac  
agattaatcgtgaacactaatagcattggttgaaaagaaagatatgtcagtcatttgatgacacctcatg  
ttgttactatctttgcctataatacattttgatcttggttttgcttaataacttgattcagATTCGTGA  
GAGGAGGCCAATATGCCATTGCACTGGCACTGCTTGATGAAGGCAGGGTTGTCTTGGGTGTGTTGGGATG  
TCCAAATCTTCCTTTTACATCAGTAAGTAACCTCAGTGGTAGCTCATCAGGAAATCAAACCTGGGGCCCTC  
TTTTCAGCGGCAATCGGTTGTGGTGCTGAAGTACAGTCGTTAGATGGCTCTCCACCACAAAAGgttatta  
tcactttcaatctcttttatttgattttaatcagtttaagactggttggtgctactctctccgtccgggtgc  
aaagtgtacatatagagatttttggacaaattatgaagtagagtaaaaaatgcattggaaaggtgcaaac  
caccatctctctcatctttaattaccaaacctccaatgagctaagtgcagtagaataaaggagaccat  
gtgtagaatgttattggtcttgattacagtgtgatgagagagaaacatttgtttctattttaaagtgc  
tggaagatagaagtgactcttttggtgacaaattttaaaaccaaagtagactcttcaccgacggagg  
gagtagtgagttatttctttcttggtgattgacttgcttctggctaacttccattacagATTAGTGTT  
TGTAACATCGACAATCCAGCCAATGCCTCGTTCTTTGAATCCTATGAAGGAGCACACTCGATGCGTGATT  
TACTGGCTGTGTAGCGGAGgtttgatcttgattactctttgcttaggctacatccattggagtagaaac  
taattctgtgtttgagtgctagtagAACTTGGTGTTCAAGCTCCTCCAGTCAGAATAGATAGCCAAGCA  
AAATATGGTGCCCTGGCCCGTGGGGATGGTGCCATTTACTGGCGTTTTCCACACGAGGGTTACAGGGAAA  
CGGTATGGGATCATGCAGCCGGCTCAATTGTCGTCACAGGtaagaacatttctctgtgtgttttttttaa  
acaacgaactcaactgaagaatacacatttcttacttccatttttctgatgtttcccagAAGCTGGAGGT  
GTAGTTAAAGATGCCTCAGGAAACGATCTCGATTTCTCGAAAGGCAGATATCTTGATCGTGACACGGGCA  
TCATTGCTACAAATAAACAGTTGATGCCATCAGTCCTGAAGTCTGTCCAG

>Ta Bobwhite *Sall* 7D

TGATTATGGTACGTGCTCACTTTGCAACTGTTTACCTCCAGGTGCCTGTATCTGCTGTTTGATGCTCAAT  
TAGCAGTCCTCATACTCAAACCATAATTCAAGTCAGTCGATGTTTCTTGATTTAACTTACATGGAGATGT  
TAAGATTTCTGAATGACATGGCTCGTGGATGTGAAGAACATTCAGGGTCGTATGATCTTCGTCAGTTTAC  
ATTCACATCTGAACTTGTTTGTCTCTCAACTTCCATTTCAGGTGATAATTTCTTTTTCATACATGTAG  
GGTCTCAAGTATTGGTAAGTCTTGTTGAATATGGAAGTAACCTTCTGGTTCCTTCTCTATGGTGGCCGA  
GGAGGTAAATCACTTGTGTTTCTGTAAATCATTTCTGTGTATGATACATAAGTATAATACACAACCTGA  
GTGTTTGTATGTACGCAGGACTCAGAAGACCTGAGAAAGGATGGCGCTGAAGAAATTCTGGAGCGCATTA

CTGATCTTGTAACAAAACCTCTCGT GAGGATGGTTCATACAACATT TATTATCTAAGGAAGCTATCCT  
CTCTGCAATTGATACCGGGAAGTCCGAGGGTGGTCCATCTGGCCGACATTGGGTTCTAGATCCAATCGAT  
GGGACTAAAGGGTGAGCCGTGGTAACTCCAAGCTGCAGGTTTCACGTTCTGCTAACGCGATAAAAAAATG  
CCTGTTTTTTCCGCCAATTTACCATCTATTGGAGTAGTTTCTACAACCTGCCTTCTTGCTCACCAGAAGT  
CCAAAACCAGTGTGCTGCTTTAATTTGTTCTGTGTTTTTCTAATCATTAATTATTTAAGGTACCACGCAC  
CACTGCCTTCTTTCAAACAACCTAGAGTTCTGACCTATGACTCTGCATACAGAAATGAATTCTTTTACCAA  
CAATCTTATTTAACAAGTAGAGATGCCAATATTACTACAGAAATTTTGTGAAGCAGTTCTATGTAAACTA  
TACACGGTTCTCTTTTCTGAGATAGCTTGTGAAGTGCTAACAACTGATCAGTTAGCTGGCAAGATTAAGT  
ACCTCTCTTTCATGCCCCATATTTTAACTAAACGTTCTAAACTGATTAATCGTGAACACTAATAGCATTT  
GTTTGAAAAGAAAGACATTGCAGTCATTTGATGACAGCTCATGTTGTTACTATCTCTGCCTATAATACAT  
TTTGATCATTTTTTTGGTTTTGTCTTAATAACTTGATTCAGATTCGTGAGAGGAGGCCAATATGCCATTGC  
ACTGGCACTGCTTGATGAGGGCAGAGTTGTCTTGGGTGTG TGGGATGTCCAAATCTTCCTTTTACATCA  
GTAAGTAACCTCAGTGGTAGCTCATCAGGAGATCAAACCTGGGGCCCTCTTTTCAGCTGCAATCGGTTGTG  
GTGCTGAAGTACAGTCGTTAGATGGCTCTCCACCACAAAAGGTTATTACCACTTTCAATCTCTTTTATTT  
GATTTTAATCAGTGATGGCTGTTTGTGCCTATGTGAGTTATTTTCTTTTCTTGTGATTGACTTGCTTCTG  
GCTAACTTTCATTACAGATCAGTGTTTGTACCATCGACAATCCAGCCAATGCCTCGTTCTTTGAATCCTA  
TGAAGGAGCACACTCAATGCGTGATTTTACTGGCTCTGTAGCGGAGGTTTGATCTTGATCACTCTTTGAT  
TAGGCTCTATCCATTCGAGTAGAACTAATTCTGTGTTTGAGTGCTAGTAGAACTTGGTGTCCAAGCTC  
CTCCAGTCAGAATAGATAGCCAAGCAAAATATGGCGCTCTGGCCCGTGGAGATGGTGCCATTTACTGGCG  
TTTTCCACACGAGGGTTACAGGGAAACGATATGGGATCATGCAGCCGGGTCAATTGTCGTACAGGTAAG  
AACATTGCTCTCTGTTTTTGAACAATGAACTCAACTGAAG
