# Supplementary material for: CRISPR-Cas9 Gene Editing of the Sal1 Gene Family in Wheat
Source: MDPI journal article supplement (doi:10.3390/plants11172259), 2022-08-30
Supplement: s1 [file s1]

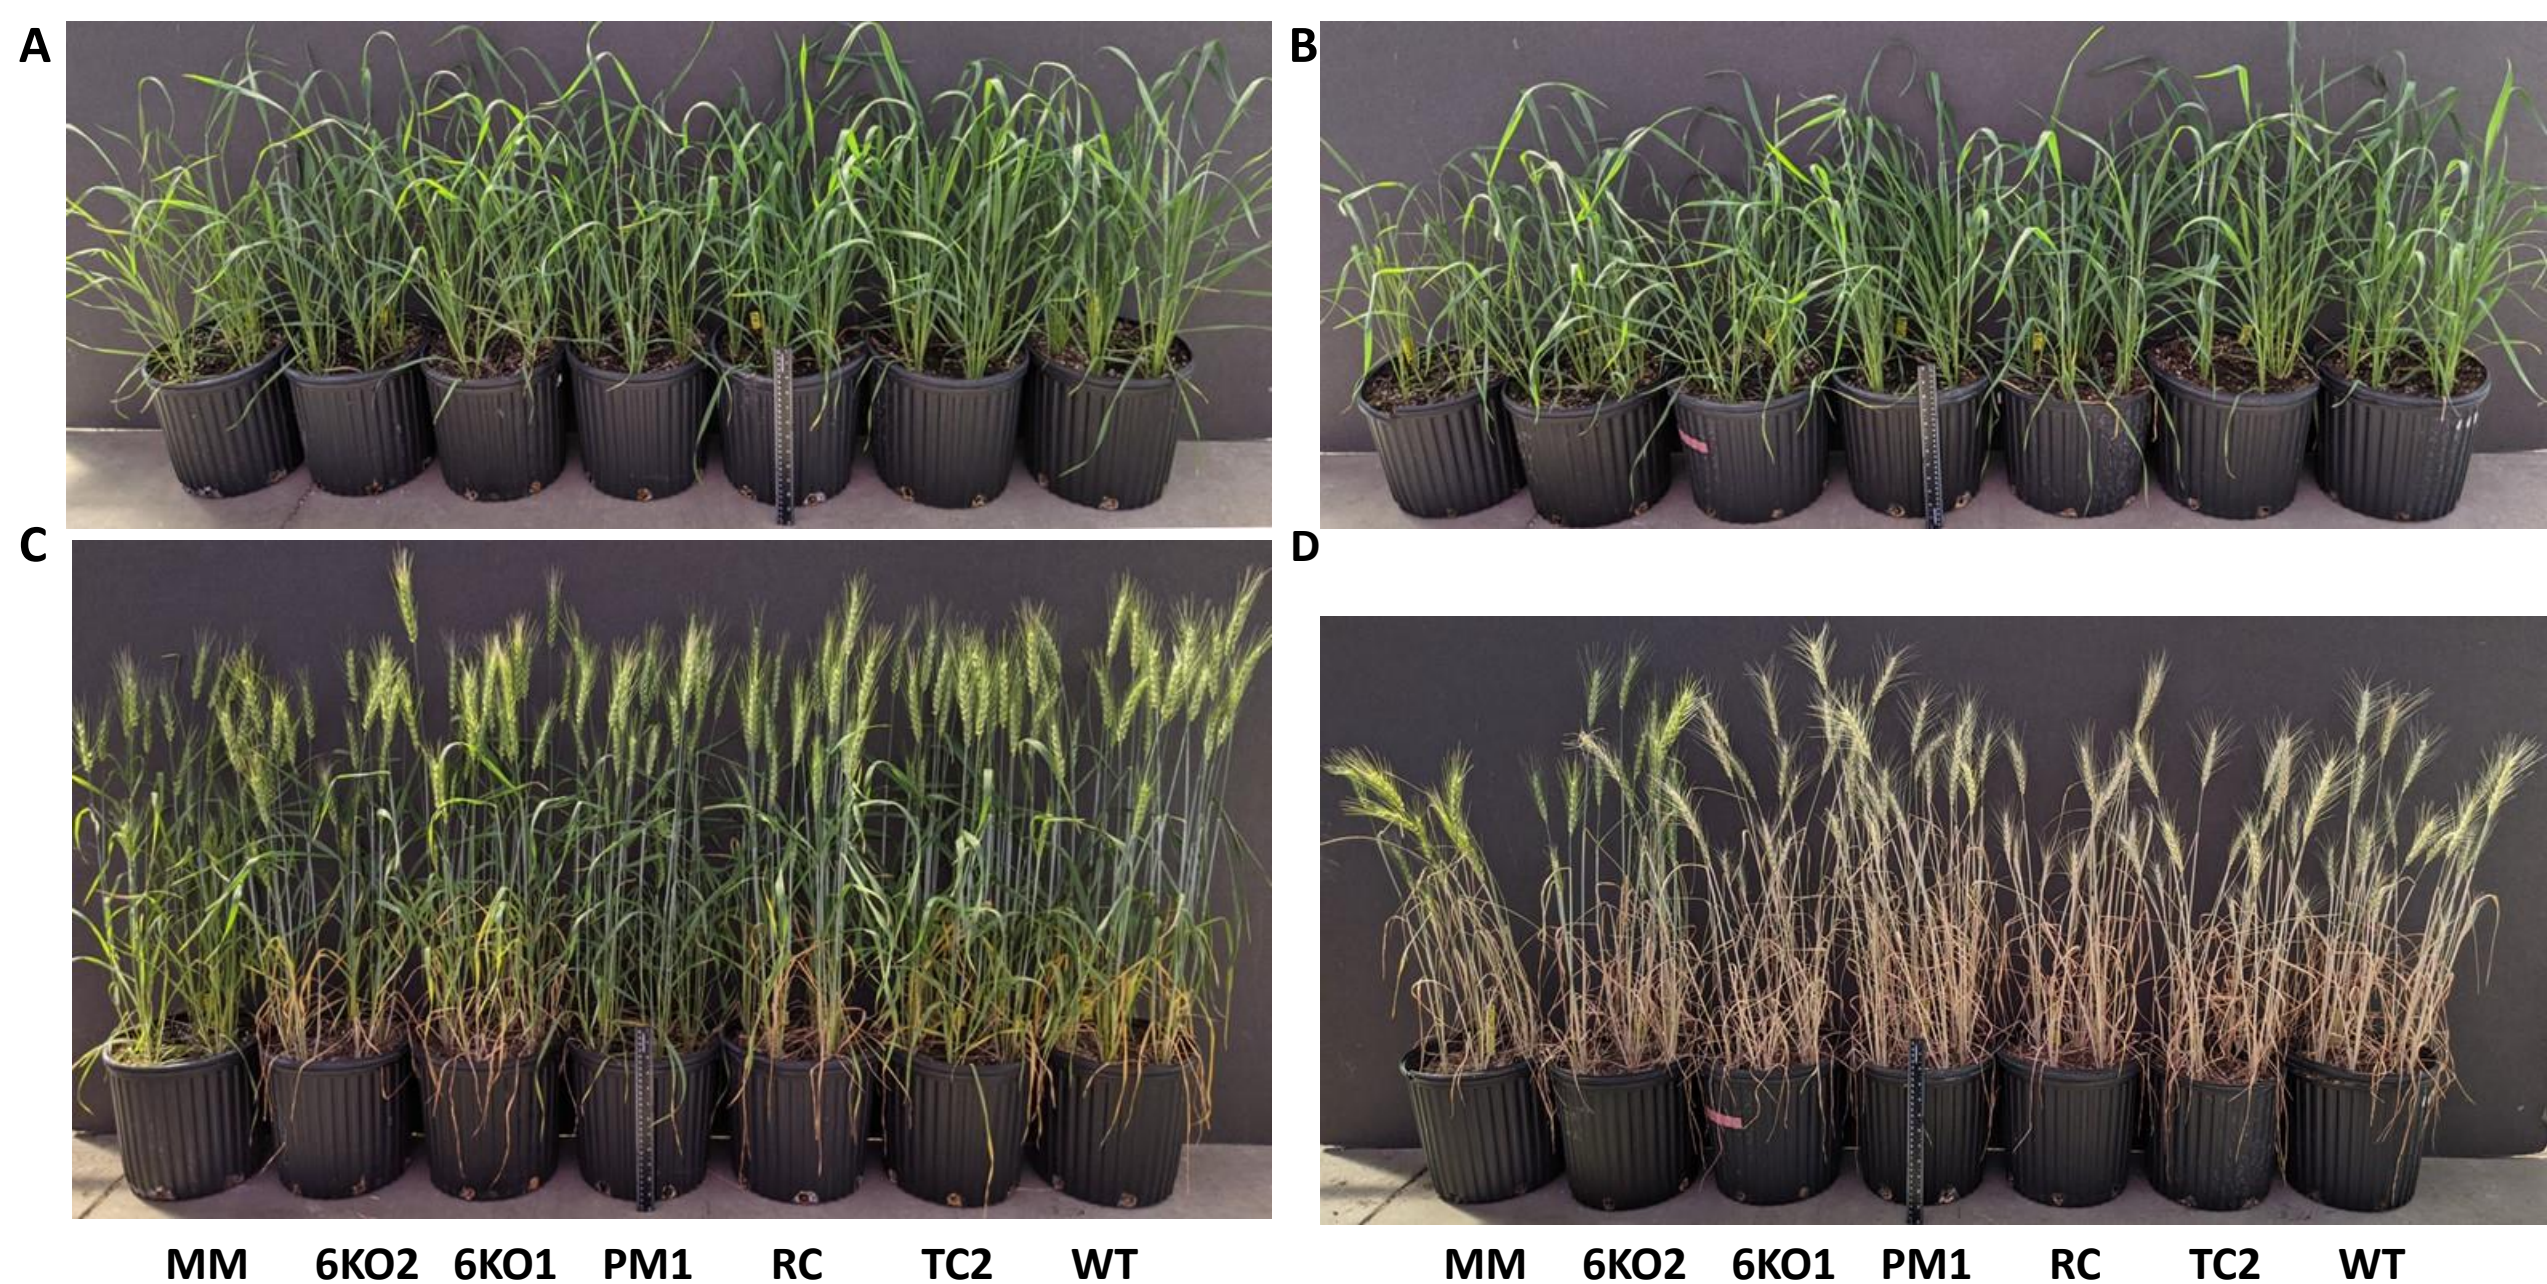

**Figure S7.** Growth of well-watered and drought treated *Sa/1* lines in single pots **A:** Well-watered wheat lines 39 days after planting. **B:** Drought-treated wheat lines 39 days after planting (at the start of terminal drought). **C:** Well-watered wheat lines 56 days after planting. **D:** Drought treated plants at 56 days after planting (17 days after onset of drought).
