# Supplementary material for: CRISPR-Cas9 Gene Editing of the Sal1 Gene Family in Wheat
Source: MDPI journal article supplement (doi:10.3390/plants11172259), 2022-08-30
Supplement: s1 [file s1]

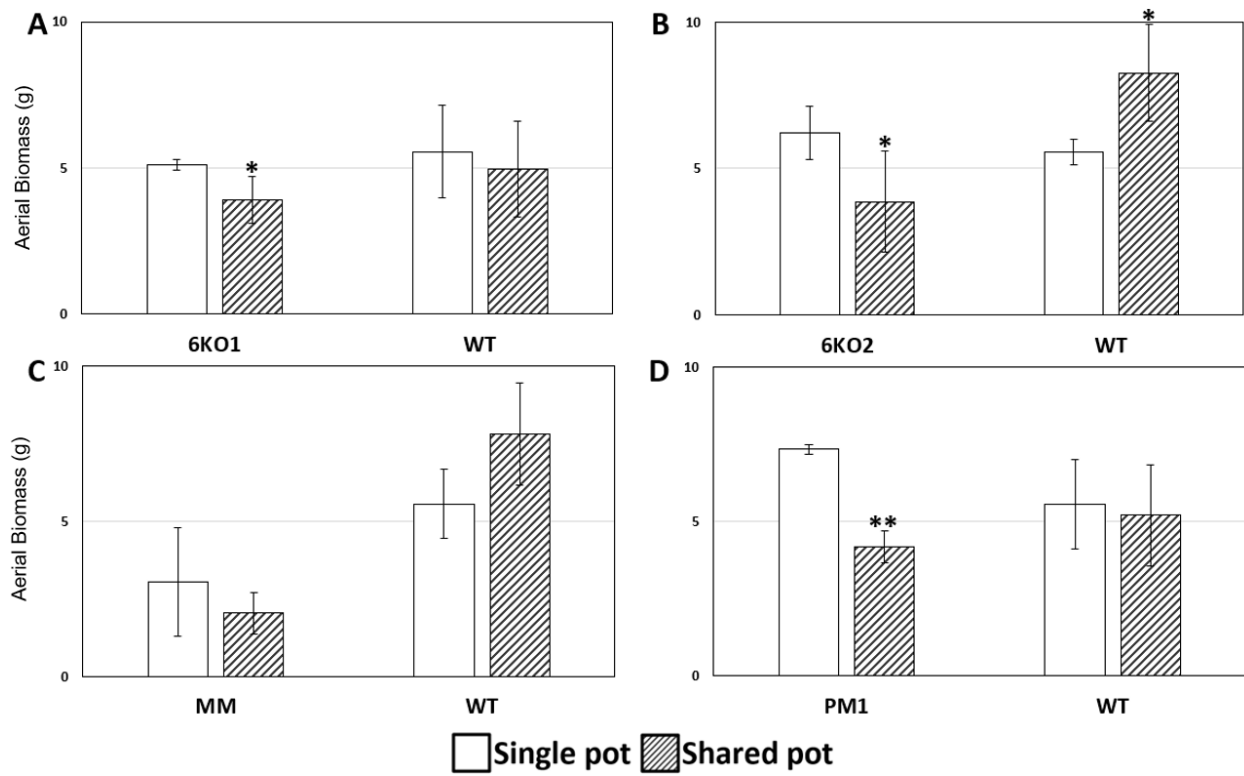

**Figure S10.** Aboveground biomass per plant (g) of drought-treated wildtype (WT) and mutant lines in single and shared pots. (A) 6KO1 (B) 6KO2 (C) MM (D) PM1. \* =  $P < 0.05$ ; \*\* =  $P < 0.01$ ,  $n \geq 3$ .
