# Supplementary material for: CRISPR-Cas9 Gene Editing of the Sal1 Gene Family in Wheat
Source: MDPI journal article supplement (doi:10.3390/plants11172259), 2022-08-30
Supplement: s1 [file s1]

**Figure S4.** CRISPR/Cas9 construct map and plasmid sequence.

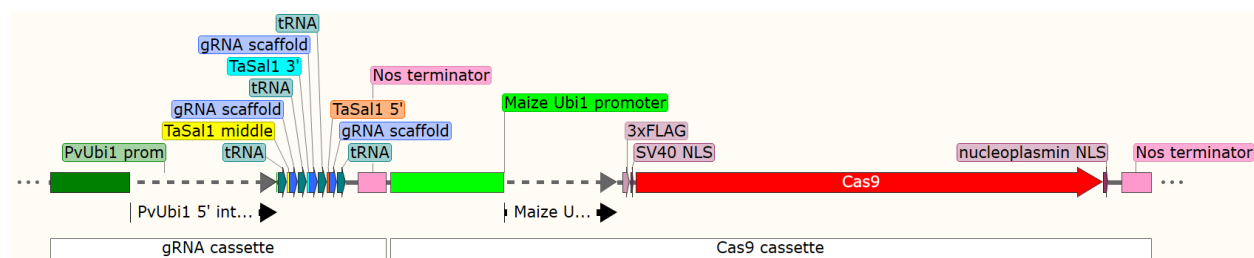

Sequence of the CRISPR plasmid vector is shown below. Regions are marked in the sequence as follows: **PvUbi promoter**, **PvUbi1 5' intron**, **tRNA**, **gRNA scaffold**, **guide RNA sequence**, **Nos terminator**, **Maize Ubi1 promoter**, **Maize Ubi1 5' intron**, **3X FLAG**, **SV40 NLS**, **Cas9**, **nucleoplasmin NLS**, plasmid vector backbone.

>Wheat CRISPR/Cas9 plasmid sequence

```
CCACTGGAGAGGGGCACACACGTCAGTGTGGTTTCCACTAGCAGGAGTAGCGCAATCAGAAAATTTTCAATGCAT
GAAGTACTAAACGAAGTTTATTTAGAAATTTTTTAAAGAAATGAGTGTAATTTTTTGCACGAATTTAATGACAATA
ATTAATCGATGATTGCCTACAGTAATGCTACAGTAACCAACCTCTAATCATGCGTCGAATGCGTCATTAGATTTCGTC
TCGCAAAATAGCACAGAATTATGAAATTAATTTTACAACTATTTTTATTTAATACTAATAATTAAGTGTCAAAGT
TTGTGCTACTCGCAAGAGTAGCGCGAACCACGCGCTGGAGGAGCAGGTAACGGCGTCTACAACTAACGGCC
ACCACCCGCCAACGCAAGGAGACGGATGAGAGTTGACTTCTTGACGGTTCTCCACCCCTCTGTCTCTGTCACTG
GGCCCTGGGTCCCCCTCTCGAAAGTTCTCTGGCCGAAATTGCGCGGCGGAGACGAGGCGGGCGGAACCGTCACGGC
AGAGGATTCTTCCCCACCTGCCTGGCCCGGCCATATATAAACAGCCACCGCCCTCCCCGTTCCCCATCGCGTCT
CGTCTCGTGTTGTTCCCGAAGACACAACCAAAATCCAAATCCTCCTCCTCCTCCCGAGCCTCGTCGATCCCTCACCCG
CTTCAAGgtacggcgatcctcctctcccttctccctcgcgattatgcgtgttccgtttccgtttccgatcgagc
gaatcgatgggttaggacctatgggggacccattgggtgtcgtgtggtgtggtgtggtgtggtgtggtgtggtgtggt
tcgtagtgtagatctgatcgaaatccctgggtgaaatcgtttgatcgtgtcattcgtgtgaggggttctagggttggagt
tgtggaggtgattctgatcgggttctgtaggtgagatttcccatgattttgcttgggtcgtttgtctgggttagatt
agatctgcccgcattttgttcgataatttctgatgcagatatgatgaataaattcgtccttgcgacccggtccgtat
gtgtattaagtttgcaggtgctagtttaggttttccctactgatttgccttatccattctgttttagcttgcaagggtt
ggtaatgggtccggcatgtttgtctctatagattagagtagaataagattatctcaacaagctgttggccttatcaatt
ttggatctgcatgtgtttcgcacatctatatctttgcaattaagatggtagatggacatatgctcctgttgagttgatg
ttgtaccttttacctgaggtctgaggaacatgcacccctcctgctactttgtgcttatacagatcatcaagattatgc
agctaataattcgatcagtttctagatctacatggtaaaacttgcacgacttgcacttgcacttatttttgatatacttggg
tgataacatatgctgctggttgattcctacatcatgatgaacattttacaggccattagtgtctgtctgtatgtgt
tgttccgtgtttgcttcagtcctatttctgtttcattcctagtttattgggttctctgctagatacttaccctgctgggc
ttagttatcatcttatctcgaatgcattttcatgtttatagatgaatatacactcagataggtgtagatgtatgcta
ctgtttctctacgttgcgtgtaggttttacctgtggcaactgcataactcctgttgcttcgctagatatgtatgtgctt
atatagattaagatatgtgtgatgggttcttttagtatatctgatgatcatgtatgctcttttaacttcttgctacact
tggtaacatgctgtgatgctgtttgttgattctgttagcactaccaatgatgacctatctctctttgtatatgatgt
ttctgtttgtttgaggcctgtgttactgctagttacttaccctgttgccctggcctaattctctgcagggatccCcatg
gaacaaagcaccagtggtctagtggtagaatagtagccctgccacggtacagaccgggttcgattcccggtcgtggtgc
aGCACTGGCACTGCTTGATGAgttttagagctagaaatagcaagttaaaataaggctagtcggttatcaacttgaaa
aagtggcaccgagtcgggtgcaacaaagcaccagtggtctagtggtagaatagtagccctgccacggtacagaccggg
ttcgattcccggtcgtggtgcATAGATAGCCAAAGCAAAATAgttttagagctagaaatagcaagttaaaataaggcta
gtcgtttatcaacttgaaaaagtggtggcaccgagtcgggtgcaacaaagcaccagtggtctagtggtagaatagtagccct
ggcaccggtacagaccgggttcgattcccggtcgtggtgcGGACTCAGAAGACTTGAGAAgttttagagctagaaata
gcaagttaaaataaggctagtcggttatcaacttgaaaaagtggtggcaccgagtcgggtgcaacaaagcaccagtggtct
agtggttagaatagtagccctgccacggtacagaccgggttcgattcccggtcgtggtgcGCTAGCCATCACCATCACC
ATCACGTGTGACCTGCAGGTCTAGTGGTACCGCCCGTCCGGTCTGCGCGTCACCGAGATCTGATCCGTCGACCTG
CAGATCGTTCAAACATTTGGCAATAAAGTTTCTTAAGATTGAATCCTGTTGCCGGTCTTGCGATGATTATCATATAA
TTTCTGTTGAATTACGTTAAGCATGTAATAATTAACATGTAATGCATGACGTTATTTATGAGATGGGTTTTTATGAT
```

[illegible]

cgacagcctgacctttaagaggacatccagaaagcccaggtgtccggccagggcgatagcctgcacgagcacattg  
ccaatctggccggcagccccgccattaagaagggcatcctgcagacagtgaaggtggtggacgagctcgtgaaagtg  
atgggcccggcacaagccccgagaacatcgtgatcgaaatggccagagagaaccagaccaccagaagggacagaagaa  
cagccgcgagagaatgaagcggatcgaagagggcatcaaagagctgggcagccagatcctgaaagaacaccccgagg  
aaaacacccagctgcagaacgagaagctgtacctgtactacctgcagaatgggcgggatatgtacgtggaccaggaa  
ctggacatcaaccggctgtccgactacgatgtggaccatatcgtgcctcagagctttctgaaggacgactccatcga  
caacaaggtgctgaccagaagcgacaagaacccggggcaagagcgacaacgtgccctccgaagaggtcgtgaagaaga  
tgaagaactactggcggcagctgctgaacgccaaagctgattaccagagaaagttcgacaatctgaccaaggccgag  
agaggcggcctgagcgaactggataaaggccggcttcacaaagagacagctggtggaaacccggcagatcaciaagca  
cgtggcacagatcctggactcccgatgaacactaagtacgacgagaatgacaagctgatccgggaagtgaagtga  
tcacctgaagtcgaagctggtgtccgatttccgggaaggatttccagttttacaaagtgcgcgagatcaacaactac  
caccacgcccacgacgcctacctgaacgcgctcgtgggaaccggccctgatcaaaaagtaccctaagctggaaagcga  
gttcgtgtacggcgactacaagggtgtacgacgtgcggaagatgatcgccaagagcgagcaggaaatcggcaaggcta  
ccgccaagtacttcttctacagcaacatcatgaacttttcaagaccgagattaccctggccaacggcgagatccgg  
aagcggcctctgatcgagacaaacggcgaaacccggggagatcgtgtgggataaaggccgggattttgccaccgtgcg  
gaaagtgtgagcatgccccaaagtgaatatcgtgaaaaagaccgaggtgcagacaggcggcttcagcaaagagtcta  
tcctgccccagaggaacagcgataagctgatcgccagaaagaaggactgggaccctaagaagtacggcggcttcgac  
agccccaccgtggcctatttctgtgctggtggtggccaaagtggaaaagggcaagtccaagaaactgaagagtgtgaa  
agagctgctggggatcaccatcatggaaagaagcagcttcgagaagaatcccatcgactttctggaagccaagggtc  
acaaagaagtgaaaaaggacctgatcatcaagctgcctaagtaactccctgttcgagctggaaaacggccggaagaga  
atgctggcctctgcccggcgaactgcagaagggaaacgaactggccctgccctccaaatatgtgaacttctgtacct  
ggccagccactatgagaagctgaagggctcccccgaggataatgagcagaaacagctgtttgtggaacagcacaagc  
actacctggacgagatcatcgagcagatcagcgagttctccaagagagtgatcctggccgacgctaactctggacaaa  
gtgctgtccgcctacaacaagcaccgggataagcccatcagagagcaggccgagaatatcatccacctgtttacct  
gaccaatctgggagccctgcgccttcaagtaactttgacaccaccatcgaccggaagaggtacaccagcaccaaag  
aggtgctggacgccaccctgatccaccagagcatcaccggcctgtacgagacacggatcgacctgtctcagctggga  
ggcgacaaaaggccggcggccacgaaaaaggccggccaggcaaaaaagaaaaagTAAGAattcgcgccgcactcga  
gatatctagaccagcttttctgtacaaagtgggtgataacagcgactacaaggatgacgatgacaaggcttagagc  
tcgaatttccccgatcggttcaaacatttggcaataaagtttcttaagattgaatcctgttgcgggtcttgcgatgat  
tatcatataatttctgttgaattacgttaagcatgtaataaataacatgtaatgcatgacgttatttatgagatggg  
tttttatgattagatcccgcaattatatacatttaatacgcgtagaaaaacaaaatatagcgcgcaactaggataaaa  
ttatcgcgcgcggtgtcatctatgttactagatcggaattcactggccgtcgtttttacactggccgtcgtttttaca  
acgtcgtgactgggaaaaccctggcgttacccaacttaatcgcttgcagcacatccccctttcgccagctggcgta  
atagegaagagggccgcaccgatcgcccttcccaacagttgcgcagcctgaatggcgaatgctagagcagcttgagc  
ttggatcagattgtcgttttccgccttcagtttgcacCCTAGTGGTACCGCCCCGTCCGGTCTGCCCCGTACCGAG  
ATCTGATCCGTGCACCTGCAGATCGTTCAAACATTTGGCAATAAAGTTTCTTAAGATTGAATCCTGTTGCCGGTCTT  
GCGATGATTATCATATAATTTCTGTTGAATTACGTTAAGCATGTAATAATTAACATGTAATGCATGACGTTATTTAT  
GAGATGGGTTTTTATGATTAGAGTCCCGCAATTATACATTTAATACGCGATAGAAAACAAAATATAGCGCGCAAAC  
AGGATAAATTATCGCGCGCGGTGTCATCTATGTTACTAGATCCGATGATAAGCTGTCAAACATGAGAATTATAACTT  
CGTATAGCATACATTATACGAAGTTATGAGCTCGAATTCGTAATCATGGTCATAGCTGTTTCCTGTGTGAAATTGTT  
ATCCGCTCACAAATCCACACAACATACGAGCCGGAAGCATAAAGTGTAAGCCTGGGGTGCCTAATGAGTGAGCTAA  
CTCACATTAATTGCGTTGCGCTCACTGCCCGCTTTCCAGTCGGGAAACCTGTCTGTGCCAGCTGCATTAATGAATCGG  
CCAACGCGCGGGGAGAGGCGGTTTGGCGTATTGGGCGCTCTTCCGCTTCCTCGCTCACTGACTCGCTGCGCTCGGTCTG  
TTCGGCTGCGGCGAGCGGTATCAGCTCACTCAAAGGCGGTAATACGGTTATCCACAGAATCAGGGGATAACGCAGGA  
AAGAACATGTGAGCAAAAGGCCAGCAAAAGGCCAGGAACCGTAAAAAGGCCGCGTTGCTGGCGTTTTTCCATAGGCT  
CCGCCCTTGCAGGACATCACAAAAATCGACGCTCAAGTCAGAGGTGGCGAAACCCGACAGGACTATAAAGATACC  
AGGCGTTTTCCCCCTGGAAGCTCCCTCGTGCCTCTCCTGTTCCGACCCTGCCGCTTACCGGATACCTGTCCGCTTT  
CTCCCTTCGGGAAGCGTGGCGCTTTCTCATAGCTCAGCTGTAGGTATCTCAGTTCGGGTGAGGTGCTTCGCTCCAA  
GCTGGGCTGTGTGCACGAACCCCCGTTAGCCCCAGCGCTGCGCCTTATCCGGTAACATATCGTCTTGAGTCCAACC  
CGGTAAGACACGACTTATCGCCACTGGCAGCAGCCACTGGTAACAGGATTAGCAGAGCGAGGTATGTAGGCGGTGCT  
ACAGAGTTCTTGAAGTGGTGGCCTAACTACGGCTACACTAGAAGGACAGTATTTGGTATCTGCGCTCTGCTGAAGCC  
AGTTACCTTCGGA AAAAGAGTTGGTAGCTCTTGATCCGGCAAACAAACCACCGCTGGTAGCGGTGGTTTTTTTTGTTT  
GCAAGCAGCAGATTACGCGCAGAAAAAAGGATCTCAAGAAGATCCTTTGATCTTTTCTACGGGGTCTGACGCTCAG  
TGGAACGAAAACCTACGTTAAGGGATTTTGGTCATGAGATTATCAAAAAGGATCTTCACCTAGATCCTTTTAAATTA  
AAAATGAAGTTTTTAAATCAATCTAAAGTATATATGAGTAACTTGGTCTGACAGTTACCAATGCTTAATCAGTGAGG  
CACCTATCTCAGCGATCTGTCTATTTTCGTTTCATCCATAGTTGCCTGACTCCCCGTCGTGTAGATAACTACGATACGG  
GAGGGCTTACCATCTGGCCCCAGTGCTGCAATGATACCGCGAGACCCACGCTCACCGGCTCCAGATTTATCAGCAAT

AAACCAGCCAGCCGGAAGGGCCGAGCGCAGAAGTGGTCCTGCAACTTTATCCGCCTCCATCCAGTCTATTAATTGTT  
GCCGGGAAGCTAGAGTAAGTAGTTTCGCCAGTTAATAGTTTGCGCAACGTTGTTGCCATTGCTACAGGCATCGTGGTG  
TCACGCTCGTCGTTTGGTATGGCTTCATTAGCTCCGGTCCCAACGATCAAGGCGAGTTACATGATCCCCCATGTT  
GTGCAAAAAGCGGTTAGCTCCTTCGGTCCTCCGATCGTTGTCAGAAGTAAGTTGGCCGCAGTGTTATCACTCATGG  
TTATGGCAGCACTGCATAATTCTCTTACTGTCATGCCATCCGTAAGATGCTTTTCTGTGACTGGTGAGTACTCAACC  
AAGTCATTCTGAGAATAGTGTATGCGGCGACCGAGTTGCTCTTGCCCGGCGTCAATACGGGATAATACCGCGCCACA  
TAGCAGAACTTTAAAAGTGCTCATCATTTGGAACGTTCTTCGGGGCGAAACTCTCAAGGATCTTACCGCTGTTGA  
GATCCAGTTTCGATGTAACCCACTCGTGCACCCAACTGATCTTCAGCATCTTTTACTTTACCAGCGTTTCTGGGTGA  
GCAAAAACAGGAAGGCAAAATGCCGCAAAAAGGGAATAAGGGCGACACGGAAATGTTGAATACTCATACTCTTCCT  
TTTTCAATATTATTGAAGCATTATCAGGGTTATTGTCTCATGAGCGGATACATATTTGAATGTATTTAGAAAAATA  
AACAAATAGGGGTTCCGCGCACATTTCCCCGAAAAGTGCCACCTGACGTCTAAGAAACCATTATTATCATGACATTA  
ACCTATAAAAATAGGCGTATCACGAGGCCCTTTCGTCTCGCGCGTTTCGGTGATGACGGTGAAAACCTCTGACACAT  
GCAGTCCCGGAGACGGTCACAGCTTGTCTGTAAGCGGATGCCGGGAGCAGACAAGCCCGTCAGGGCGCGTCAGCGG  
GTGTTGGCGGGTGTGCGGGCTGGCTTAACTATGCGGCATCAGAGCAGATTGTACTGAGAGTGCACCATATGCGGTGT  
GAAATACCGCACAGATGCGTAAGGAGAAAATACCGCATCAGGCGCCATTGCCATTAGGCTGCGCAACTGTTGGGA  
AGGGCGATCGGTGCGGGCCTCTTCGCTATTACGCCAGCTGGCGAAAGGGGGATGTGCTGCAAGGCGATTAAGTTGGG  
TAACGCCAGGGTTTTCCCAGTCACGACGTTGTAAACGACGGCCAGTGCCAAGCTTTtttGCGGCCGC
