# Supplementary material for: CRISPR-Cas9 Gene Editing of the Sal1 Gene Family in Wheat
Source: MDPI journal article supplement (doi:10.3390/plants11172259), 2022-08-30
Supplement: s1 [file s1]

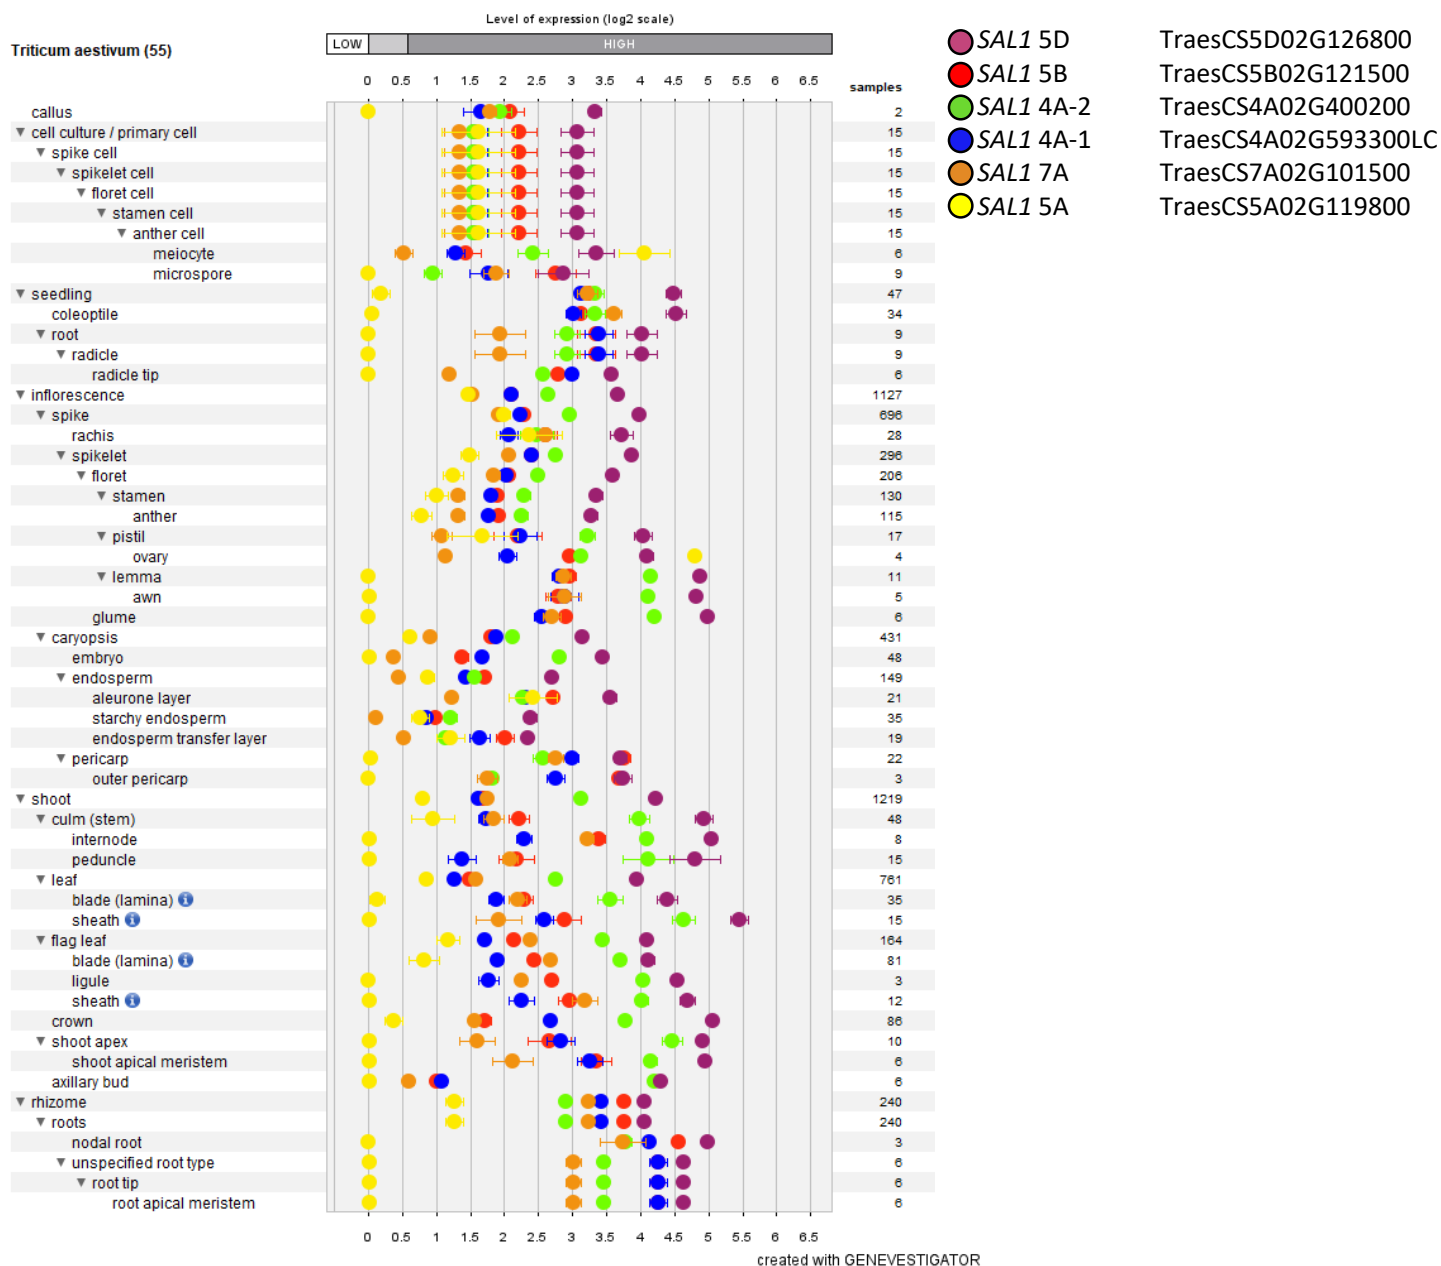

**Figure S1:** Expression levels of *Sal1* alleles in different wheat tissues based on publicly available transcriptomic data created in Genevestigator (<https://genevestigator.com/>) April 19, 2022. The 7D homeolog is not shown since it was not annotated in the available datasets.
