# Supplementary material for: CRISPR-Cas9 Gene Editing of the Sal1 Gene Family in Wheat
Source: Plants (Basel). 2022 Aug 30;11(17):2259. doi: 10.3390/plants11172259 (PMC9460255; doi:10.3390/plants11172259)
Supplement: Supplementary file 1 [file plants-11-02259-s001.zip]

Archive with 11 entries (11 files):
- Mohr Figure S1.pdf
- Mohr Figure S10 revised.pdf
- Mohr Figure S2.pdf
- Mohr Figure S3.pdf
- Mohr Figure S4.pdf
- Mohr Figure S5 revised.pdf
- Mohr Figure S6 revised.pdf
- Mohr Figure S7 revised.pdf
- Mohr Figure S8 revised.pdf
- Mohr Figure S9 revised.pdf
- Mohr Table S1 -S5 revised.xlsx
