# Supplementary material for: CRISPR-Cas9 Gene Editing of the Sal1 Gene Family in Wheat
Source: Plants (Basel). 2022 Aug 30;11(17):2259. doi: 10.3390/plants11172259 (PMC9460255; doi:10.3390/plants11172259)
Supplement: Supplementary file 1 [file plants-11-02259-s001.zip › Mohr Table S1 -S5 revised.xlsx]

## Sheet: Table S1
	Table S1: Primers used for genotyping and sequencing Sal1 alleles
	Primer name	Primer sequence	Target(s)
	1303_F	GGTTCATTTTCTATGGTGGCCGAA	5B, 5D, (5A)
	1304_R	GGACCTCCTTCAGACTTCCCA	5B, 5D, (5A)
	1315_R	TCCTGGACAGACTTCAGCAG	5B, 5D, (5A)
	1372_F	AGCACCTCTTGTTGTTACTATC	5D
	1330_F	CATTAGGCCCATTACGTACTCT	5B
	1363_F	AGTTTCTTGAGAGGAGGCCA	5B
	1461_R	CCCCATTTGATCTCCGCATG	5D
	1380_F	ATGGTACGTGCTCACTTTGC	7D
	1381_R	CCTGTGACGACAATTGACCC	7D
	1386_F	TTCGTTCTCTCAACTTCCCG	4A-1
	1387_R	CCTGTGTCACGGTCAAGAAA	4A-1
	1388_F	TGCCTGTATCTGTTGTTTGGT	4A-2
	1389_R	TCAGTTGAGTTCATCGTTTCG	4A-2
	1390_F	TGGTACATGCTCACTCTGTA	7A
	1391_R	GTGTCACGATCAAGATATCTGC	7A
	1468_F	CCGTCCGGTGCAAAGTGTA	7A

## Sheet: Table S2
	Table S2: Sequences of Sal1 CRISPR/Cas9 gRNA targets
	Sal1 Target site	Sequence
	5' gRNA+PAM	GGACTCAGAAGACTTGAGAAnGG
	middle gRNA+PAM	GCACTGGCACTGCTTGATGAnGG
	3' gRNA+PAM	ATAGATAGCCAAGCAAAATAnGG

## Sheet: Table S3
			Table S3: Primers used for confirming transgenes in transgenic wheat lines
			Primer name	Primer sequence	Target(s)	Expected product size
			1231_F	AGCAGCCGACAAGAAGTACAG	Cas9	474 bp
			1232_R	GCCAGATAGATCAGCCGCA
			678_F	CCACTACATCGAGACAAGCACGG	BAR gene for bialophose resistance	259 bp
			908_R	CTTCAGCAGGTGGGTGTAGAGC
			1249_F	TGTTTGGTTTCCACTAGCACGA	Switchgrass ubiquitin promoter (PvUbi1)	402 bp
			1250_R	AAGAAGTCAACTCTCATCCGTCTC
			1251_F	TCCTGTTGAGTTGATGTTGTACCT	Switchgrass ubiquitin promoter (PvUbi1) 5' intron	478 bp
			1252_R	AAGCACATACATATCTAGCGAAGCA

## Sheet: Table S4
	Table S4: Detailed description of the independent plant lines used in experiments
	Transformation #	Plant #	T0 notes	T0 CAPS assay chromosome 5	T0 CAPS assay chromosomes 7 and 4	T1 plant number	T1 notes	T2 plant #	T2 notes	T3	Line name
	22	8	-	all uncut	all uncut	-	5 lines grown as a control, all uncut	-	CAPS - all WT; used in experiments	-	TC1
	22	41	Chimeric plant - some seeds WT, some seeds transgenic and mutant	all uncut	mostly uncut, faint cut band	5	Full KO	-	5 plants grown for seed	sequenced, used in expts	6KO1
				-	-	7	Nontransgenic, nonmutant plant from chimeric parent. Good regeneration control and comparison for full KO lines.	-	5 plants grown for seed	CAPS - all WT; used in experiments	RC
	23	9	sickly plant (only one tiller, 7 seeds)	mix of cut and uncut	mix of cut and uncut	2	many mutations by CAPS but no full knockouts in 4 viable seeds, all transgenic; grow and check T2 from all 4	2	Full KO by CAPS	sequenced, used in expts	MM
	25	3B	2 siblings with same inherited mutations - 3 and 3B; worked with 3B since it had more seeds	all uncut	all uncut	#3	all transgenic mutant, select one to propagate (6KO2)	grown for seed	5 plants grown for seed	sequenced, used in expts	6KO2
	29	6B	-	all cut	possible faint uncut?	1	all T1 plants WT by CAPS, grown and rechecked in T2	-	CAPS - all WT; 4 plants grown for seed	CAPS - all WT; used in experiments	TC2
	30	11	2 siblings with different mutations - G and M. M used for experiment.	M=all cut	M=mix of cut and uncut	1	Same as T0	-	Mutant phentoype measured, 4 plants grown for seed	sequenced, used in expts	PM1
	31	6		mix of cut and uncut	all cut	2, 3, 4	3 nontransgenic seedlings grown, no phenotype; seeds collected from all three for experiment	-	sequenced, used in expts	-	PM2
	Bobwhite	-	parent line	all cut	all cut	-	used seed bulked from 5 plants that was the same age as other seed used in experiments	-	-	-	WT BW

## Sheet: Table S5
	Table S5: Detailed annotation of the mutations in the Bobwhite mutant lines
		Sal1 alleles
			5B			5D			4A-1			4A-2			7A			7D
	Lines	5'	middle	3'	5'	middle	3'	5'	middle	3'	5'	middle	3'	5'	middle	3'	5'	middle	3'	Phenotype	Generation of seed used	Genotype method
	WT	WT	WT	WT	WT	WT	WT	WT	WT	WT	WT	WT	WT	WT	WT	WT	WT	WT	WT	WT	-	CAPS and sequence
	RC			WT			WT			WT			WT			WT			WT	WT	T3	CAPS
	TC1			WT			WT			WT			WT			WT			WT	WT	T3	CAPS
	TC2			WT			WT			WT			WT			WT			WT	WT	T3	CAPS
	PM1	WT	WT	WT	WT	WT	WT	not amplified	not amplified	not amplified	WT	WT	WT	WT	1 bp deletion on one allele	C-G mutation in 3' site (blocks XcmI) on other allele	WT	WT	WT	Mutant stems	T3	CAPS and sequence
	PM2	WT	WT	WT	WT	WT	1 bp insert	not amplified	not amplified	not amplified	not amplified	not amplified	not amplified	WT	WT	WT	not amplified	not amplified	not amplified	WT	T2	CAPS and sequence
	MM1	not amplified	1 bp insertion	1 bp deletion	WT	not amplified	not amplified	WT	3 bp deletion - 1 amino acid (Asp) deletion, no frameshift	WT	10 bp deletion	3 bp deletion WT 110 bp of 4A-1 replacing 4A-2	1 bp deletion	not sequenced	50 bp insertion	13 bp deletion	WT	deletion between middle and 3'	deletion between middle and 3'	Mutant stems	T3	CAPS and sequence
	6KO1	not amplified	not amplified	not amplified	10 bp deletion	3 bp deletion	8 bp deletion	mutant	deleted	mutant	deleted	deleted	fused to 4A-1	mutation and insertion	mutation and insertion	mutation and insertion	WT	mutation and insertion	mutation	Mutant stems	T3	CAPS and sequence
	6KO2	14 bp deletion	1 bp insertion	13 bp deletion	Deletion between 5' and middle	Deletion between 5' and middle	56 bp of PvUbi1 promoter insertion in the middle of the 3' site	2 bp deletion	16 bp deletion	deleted after 6 bp	only 16 bp left	3 bp deletion	1 bp deletion	not amplified	15 bp insertion	insertion of 21 bp maize Ubi promoter into site	WT	deletion between middle and 3'	deletion between middle and 3'	Mutant stems	T3	CAPS and sequence
	WT	wildtype based on CAPS assay
		not sequenced
		sequenced mutation
	not amplified	not present

## Sheet: Figure 2C CAPS primers
	Figure 2C CAPS primers
	Primer name	Sequence	Targets	Expected product size	Expected XcmI digest band sizes
	1305_F	TGGTGCTGAAGTAGAGTCATTAGAG	Chromosome 5 genes	712 bp	378 bp
	1306_R	GTGATGGCATCAACTGCTTATTTGTG			334 bp
	1317_F	ACTCGATGCGTGATTTTAC	Chromosome 7 and 4 genes	485 bp	329 bp
	1318_R	CTGGACAGACTTCAGGACT			156 bp

## Sheet: Figure S6C qRTPCR primers
	Figure S6C : The primers used for the reference transcript (CJ7052892) and Sal1 transcripts.
	Primer	Oligo Sequence 5' to 3'	Product size (bp)	Target	Source
	CJ705892_Forward1	GCCTCAGTGGTAGGAGCATT	116	CJ705892	[45]
	CJ705892_Reverse1	TTCAGCAAATGCGGTGGTTG
	1491	AGTTGTTTTGGGCGTGTTGG	98	Sal1 Chromosome 5	This study
	1492	TCTACTTCAGCACCACAACCA
	1457	TGCGTGATTTTACTGGCTGTG	187	Sal1 Chromosomes 7 and 4	This study
	1458	GGCTGCATGATCCCATACCG
